# Supplementary material
Source: HighWire-hosted journal article supplement (https://cmaj.ca/highwire/filestream/59378/field_highwire_adjunct_files/2/150003-res-3-at.pdf)
Supplement: 150003-res-3-at.pdf [file 150003-res-3-at.pdf]

**Appendix 3 (as supplied by the authors): Number of each imaging test performed by body site and imaging modality**

|                                                |              | <b>Initial<br/>Imaging</b> | <b>Confirmatory<br/>Imaging</b> |
|------------------------------------------------|--------------|----------------------------|---------------------------------|
| <b>Stage I (N=13,724)</b>                      |              |                            |                                 |
| <b><i>Skeletal Imaging</i></b>                 |              |                            |                                 |
|                                                | Bone scan    | 5,755                      | 497                             |
|                                                | CT           | 88                         | 116                             |
|                                                | MRI          | 517                        | 916                             |
|                                                | XRAY         | 925                        | 1401                            |
| <b><i>Thoracic Imaging</i></b>                 |              |                            |                                 |
|                                                | CT           | 624                        | 783                             |
|                                                | XRAY         | 8,924                      | 1,841                           |
| <b><i>Abdominal and /or pelvic imaging</i></b> |              |                            |                                 |
|                                                | US           | 7,648                      | 1,223                           |
|                                                | MRI          | 40                         | 188                             |
|                                                | CT           | 2,033                      | 690                             |
| <b><i>Other imaging</i></b>                    |              |                            |                                 |
|                                                | US           | 295                        | 34                              |
|                                                | MRI          | 95                         | 124                             |
|                                                | CT           | 406                        | 29                              |
|                                                | XRAY         | 66                         | 10                              |
|                                                | PET          | 5                          | 0                               |
|                                                | <b>TOTAL</b> | <b>27,421</b>              | <b>7,852</b>                    |
| <b>Stage II (N=12,823)</b>                     |              |                            |                                 |
| <b><i>Skeletal Imaging</i></b>                 |              |                            |                                 |
|                                                | Bone scan    | 9,085                      | 769                             |
|                                                | CT           | 69                         | 243                             |
|                                                | MRI          | 357                        | 1,021                           |
|                                                | XRAY         | 688                        | 1733                            |
| <b><i>Thoracic Imaging</i></b>                 |              |                            |                                 |
|                                                | CT           | 1450                       | 1569                            |
|                                                | XRAY         | 9,415                      | 3,263                           |
| <b><i>Abdominal and /or pelvic imaging</i></b> |              |                            |                                 |
|                                                | US           | 9,203                      | 1,465                           |
|                                                | MRI          | 48                         | 337                             |
|                                                | CT           | 4,554                      | 1,285                           |
| <b><i>Other imaging</i></b>                    |              |                            |                                 |
|                                                | US           | 406                        | 41                              |
|                                                | MRI          | 110                        | 149                             |
|                                                | CT           | 534                        | 50                              |
|                                                | XRAY         | 119                        | 7                               |
|                                                | PET          | 6                          | 0                               |
|                                                | <b>TOTAL</b> | <b>36,044</b>              | <b>11,932</b>                   |
